# Supplementary material
Source: PubMed Central journal article supplement (PMC4890656)

**A**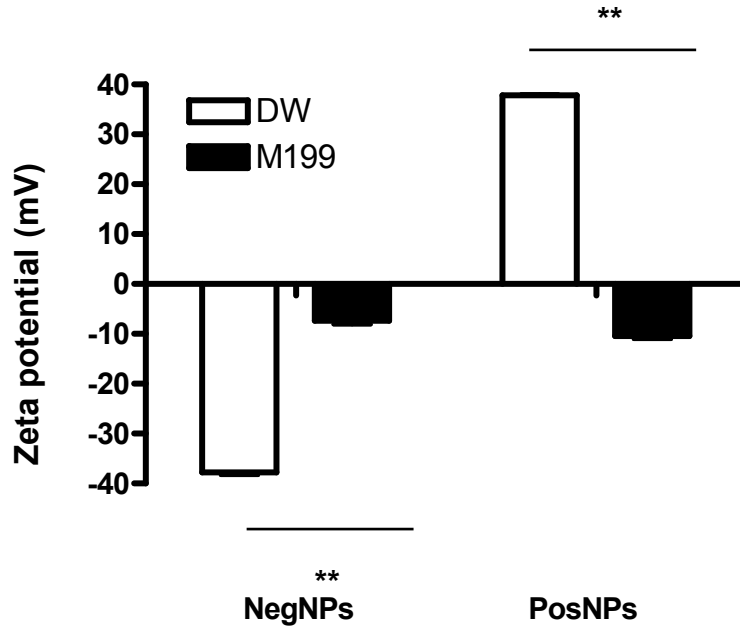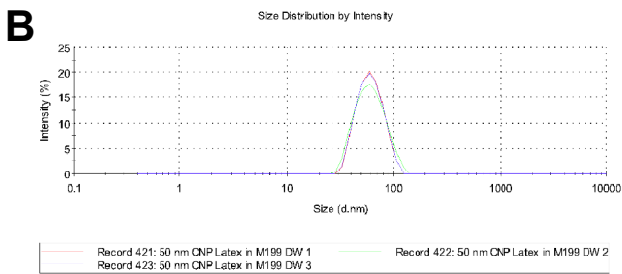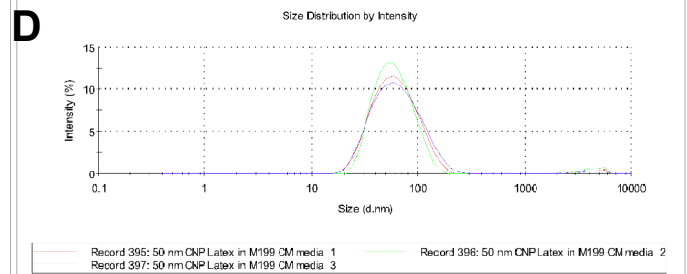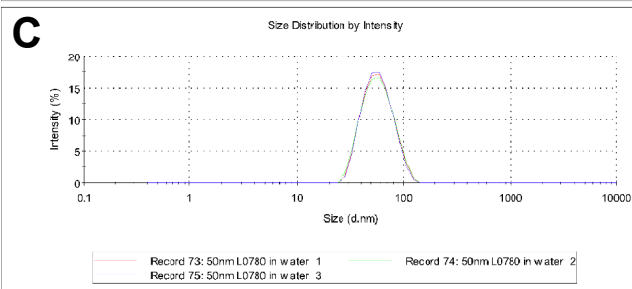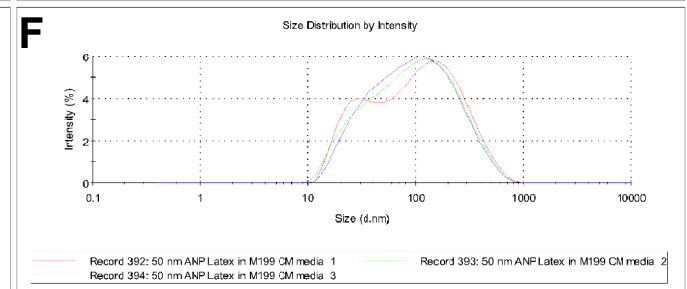**Figure I**

Supplement: NIHMS68375-supplement-Supplementary_Figure_1_.pdf [file NIHMS68375-supplement-Supplementary_Figure_1_.pdf]

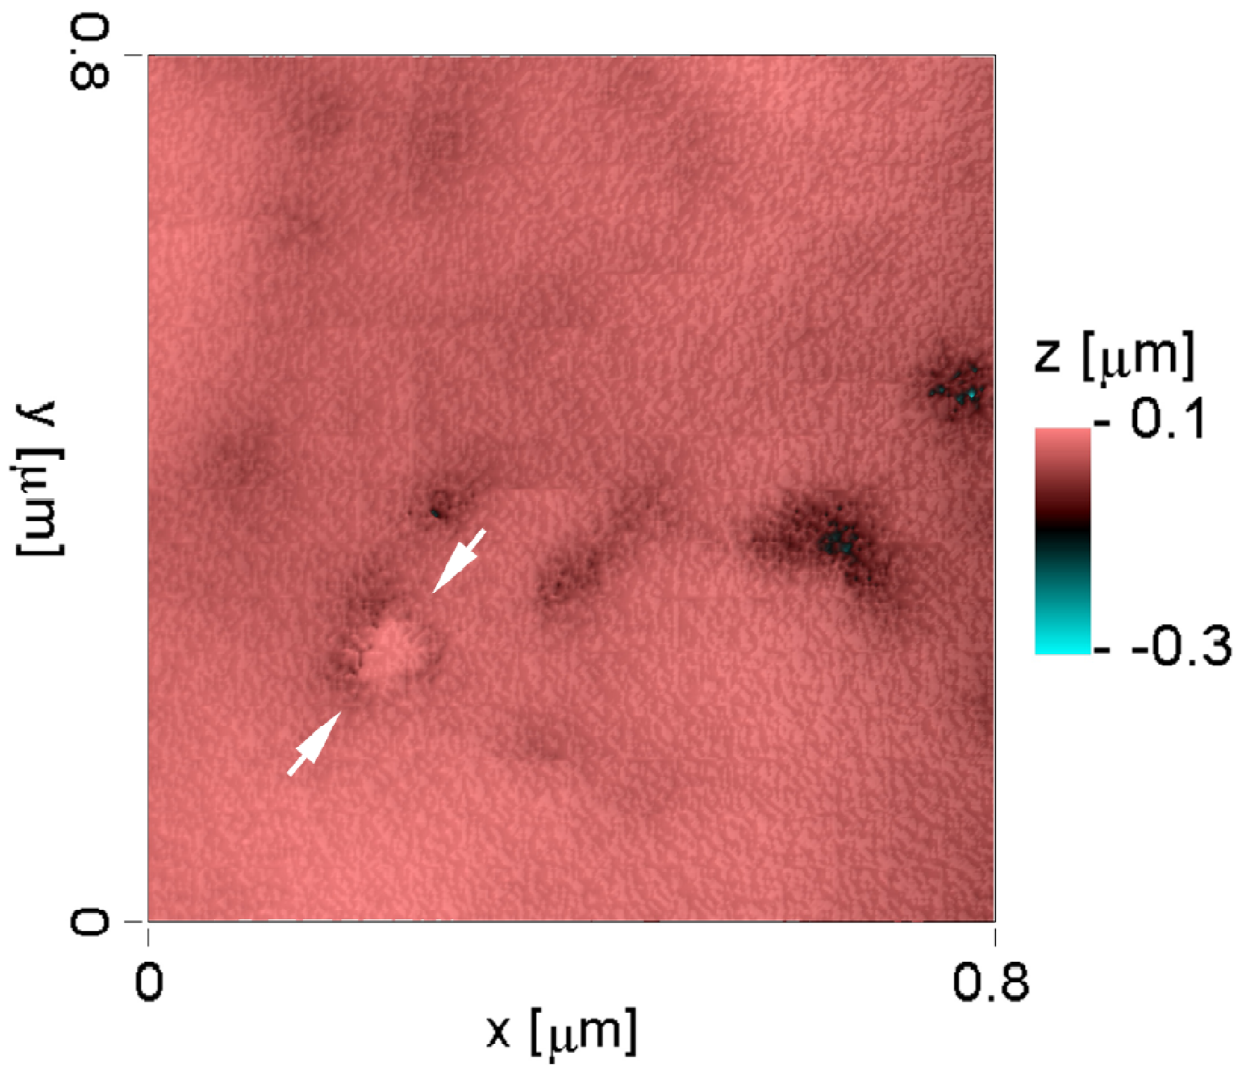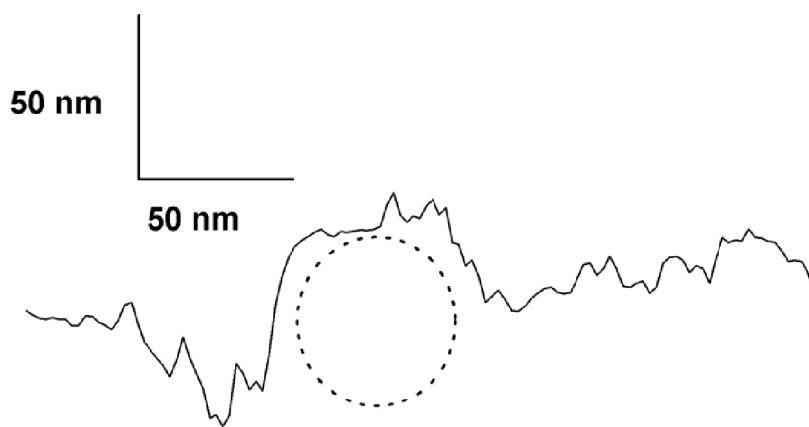

Figure II

Supplement: NIHMS68375-supplement-Supplementary_Figure_2.pdf [file NIHMS68375-supplement-Supplementary_Figure_2.pdf]
